# Supplementary material for: Applicability of paper deinking process for silver separation and concentration from a paper-based printed electronics prototype
Source: Royal Society of Chemistry journal article supplement (doi:10.1039/d5ra09210h), 2026-01-01
Supplement: d5ra09210h1.pdf [file d5ra09210h1.pdf]

## Supplementary Information

Application of paper deinking process for silver separation and concentration  
from a paper-based printed electronics prototype

João H. F. Conceição<sup>[1,2]</sup>, Denis Curtil<sup>[1]</sup>, Lilie Eude<sup>[1]</sup>, Pamela Abboud<sup>[1]</sup>, Nadège Reverdy-  
Bruas<sup>[1]</sup>, Lenka Švecová<sup>[2]</sup>, Nathalie Marlin<sup>[1]</sup>

<sup>[1]</sup> Univ. Grenoble Alpes, CNRS, Grenoble INP\*, LGP2, 38000 Grenoble, France.

<sup>[2]</sup> Univ. Grenoble Alpes, Univ. Savoie Mont Blanc, CNRS, Grenoble INP\*, LEPMI, 38000  
Grenoble, France.

\* Institute of Engineering Univ. Grenoble Alpes

Corresponding author: lenka.svecova@grenoble-inp.fr

Number of pages: 6

Number of Tables: 7

Number of Figures: 2

## Unit operations and their equipment

Figure S1 presents the different equipment used to perform the different unit operations involved in the conventional deinking recycling process.

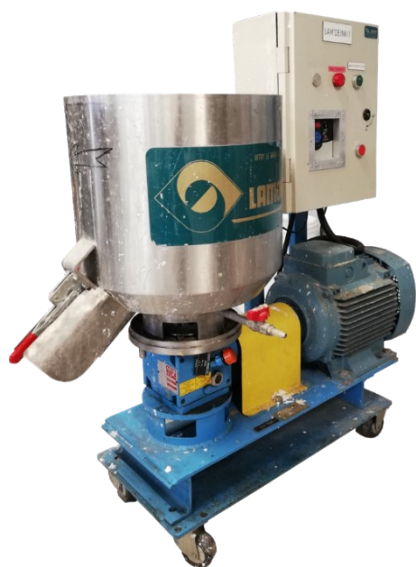

Pulper  
(PE pulping)

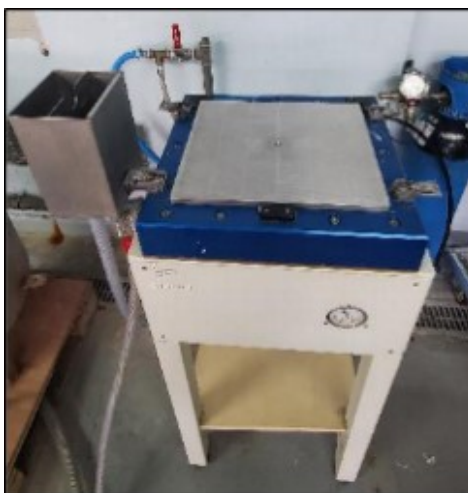

Screen  
(screening)

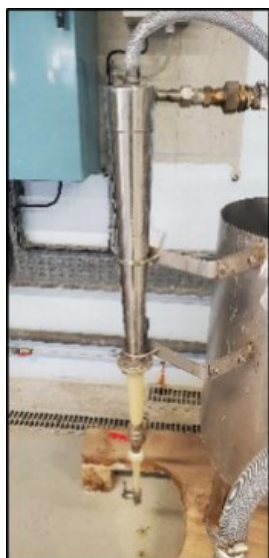

Hydrocyclone  
(centrifugal cleaning)

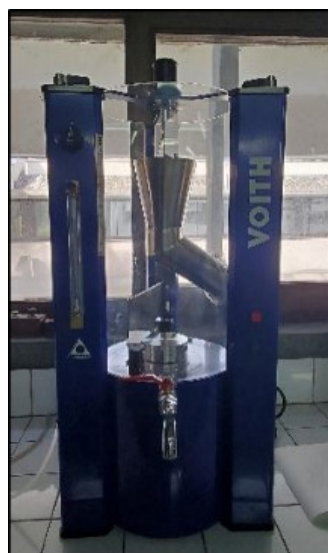

Flotation cell  
(deinking)

Figure S1. Snapshots of lab equipment running in batch mode used to simulate a conventional recycling process.

## Chemicals

Detailed information regarding the different chemicals used in this work is available in Table S1.

Table S1 - Chemical compounds used in this study and their properties. Legend: (-) not available.

| Compounds                | Chemical Formula                                                                          | Supplier                 | CAS number | Mw (g·mol <sup>-1</sup> ) | Purity (%) |
|--------------------------|-------------------------------------------------------------------------------------------|--------------------------|------------|---------------------------|------------|
| Sodium Hydroxide         | NaOH                                                                                      | Carl Roth,<br>France     | 1310-73-2  | 40.00                     | ≥98        |
| Sodium Silicate solution | Na <sub>2</sub> SiO <sub>3</sub>                                                          | Carl Roth,<br>France     | 1344-09-8  | 122.06                    | -          |
| Surfactant (Brij® S100)  | C <sub>18</sub> H <sub>37</sub> (OCH <sub>2</sub> CH <sub>2</sub> ) <sub>n</sub> OH n~100 | Sigma Aldrich,<br>France | 9005-00-9  | ~4670                     | -          |
| Nitric Acid              | HNO <sub>3</sub>                                                                          | Carl Roth,<br>France     | 7697-37-2  | 63.01                     | 65 (w/w)   |

## Unit operations stream characterization

Detailed information regarding the *h*-index study for non-printed and Grade A pulping trials are presented in Tables S2 and S3, respectively.

Table S2. Non-printed Powercoat™ XD80 sheet formation index results.

| Time (min) | Cp = 5%    |              | Cp=10%     |              |
|------------|------------|--------------|------------|--------------|
|            | 0 wt% NaOH | 0.7 wt% NaOH | 0 wt% NaOH | 0.7 wt% NaOH |
| 10         | 360.7 ±9.7 | 116.4 ±3.3   | 95.6 ±0.7  | 56.9 ±5.2    |
| 20         | 253.9 ±8.6 | 55.9 ±1.7    | 63.5 ±6.1  | 44.5 ±1.0    |
| 30         | 193.9 ±4.5 | 42.8 ±1.0    | 46.5 ±0.7  | 47.1 ±1.6    |
| 40         | 175.1 ±4.2 | 44.0 ±1.5    | 46.5 ±1.4  | 45.2 ±2.3    |

Table S3. Grade A sheet formation index evolution.

| Time (min) | Grade A     |
|------------|-------------|
| 10         | 307.4 ±10.8 |
| 20         | 209.8 ±5.1  |
| 30         | 159.4 ±6.1  |
| 40         | 121.7 ±2.6  |
| 60         | 86.8 ±1.8   |

|     |                |
|-----|----------------|
| 90  | 70.9 $\pm$ 6.2 |
| 120 | 64.1 $\pm$ 0.9 |

Furthermore, information on the screening, flotation, and centrifugal cleaning processing streams (Accept and Reject) characterization, including their mass, organic, ash, and Ag fraction, is presented in Tables S3, S4, and S6, respectively. Figure S2 presents the reject fraction deposited on the device screen and the heavy particles, mainly ink, retained at the bottom of the device.

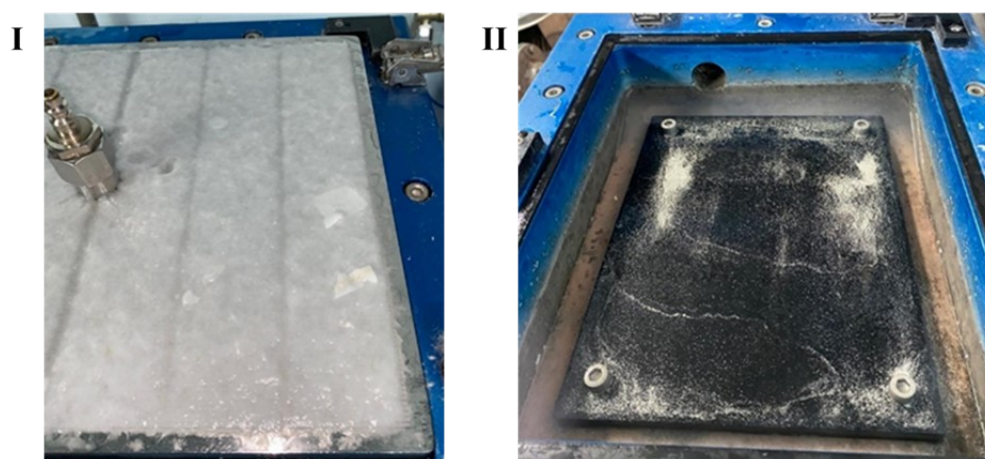

Figure S2. Snapshots of the Mix C screening trial of I – reject fraction collected on the screen; II – Somerville’s diaphragm chamber.

Table S4. Mix C screening reject stream characterization. Legend: (-) not measured.

| Properties                    | Mix C  |                 |
|-------------------------------|--------|-----------------|
|                               | Accept | Reject          |
| <b>C<sub>p</sub> (%)</b>      | -      | -               |
| <b>m<sub>dry</sub> (g)</b>    | -      | 4.4 $\pm$ 0.2   |
| <b>m<sub>ash525</sub> (g)</b> | -      | 0.30 $\pm$ 0.01 |
| <b>m<sub>org</sub> (g)</b>    | -      | 4.1 $\pm$ 0.2   |
| <b>m<sub>ash900</sub> (g)</b> | -      | 0.19 $\pm$ 0.00 |
| <b>m<sub>Ag</sub> (mg)</b>    | -      | 31.6 $\pm$ 0.9  |
| <b>SE<sub>org</sub> (%)</b>   | -      | -               |
| <b>SE<sub>Ag</sub> (%)</b>    | -      | -               |

Table S5. Flotation trials stream characterization, performed at  $C_p=1\%$ . Legend: (-) not measured.

| Properties                    | Grade B    |            | Mix C      |            | Mix D      |           | Grade A    |           |
|-------------------------------|------------|------------|------------|------------|------------|-----------|------------|-----------|
|                               | Accept     | Reject     | Accept     | Reject     | Accept     | Reject    | Accept     | Reject    |
| <b>C<sub>p</sub> (%)</b>      | 0.96 ±0.01 | -          | 0.86 ±0.02 | -          | 0.86 ±0.00 | -         | 0.91 ±0.01 | -         |
| <b>m<sub>dry</sub> (g)</b>    | 205.3 ±1.3 | 10.7 ±0.3  | 179.9 ±3.6 | 30.4 ±0.4  | 185.1 ±0.1 | 33.0 ±7.4 | 197.5 ±1.6 | 17.3 ±0.4 |
| <b>m<sub>ash525</sub> (g)</b> | 31.5 ±0.3  | 6.6 ±0.2   | 25.7 ±0.8  | 17.4 ±0.3  | 39.4 ±0.1  | 22.0 ±5.9 | 60.8 ±3.2  | 13.2 ±1.0 |
| <b>m<sub>org</sub> (g)</b>    | 173.8 ±1.1 | 4.1 ±0.1   | 154.3 ±3.2 | 13.0 ±0.2  | 145.7 ±0.1 | 11.1 ±4.0 | 136.7 ±3.4 | 4.1 ±0.9  |
| <b>m<sub>ash900</sub> (g)</b> | 20.6 ±0.2  | 4.1 ±0.1   | 16.4 ±0.6  | 10.7 ±0.2  | 27.9 ±0.1  | 16.1 ±5.6 | 42.6 ±2.5  | 9.1 ±0.8  |
| <b>m<sub>Ag</sub> (mg)</b>    | 4.2 ±0.1   | 1.27 ±0.03 | 2.7 ±0.1   | 1.15 ±0.02 | 1.90 ±0.01 | 1.4 ±0.5  | 3.0 ±0.2   | 0.2 ±0.0  |
| <b>SE<sub>org</sub> (%)</b>   | 97.7 ±0.1  | 2.3 ±0.1   | 92.2 ±0.2  | 7.8 ±0.2   | 72.9 ±2.4  | 7.1 ±2.4  | 97.1 ±0.6  | 2.9 ±0.6  |
| <b>SE<sub>Ag</sub> (%)</b>    | 76.6 ±0.6  | 23.4 ±0.6  | 70.3 ±0.2  | 29.7 ±0.8  | 57.5 ±8.5  | 42.5 ±8.5 | 93.3 ±0.8  | 6.7 ±0.8  |

Table S5 lists the centrifugal cleaning results obtained during the  $C_p$  effect study.

Table S6. Grade A centrifugal cleaning trials using different pulp consistencies. Legend: (-) not measured.

| Properties                    | 0.50%      |            | 0.75%      |            | 1.0%       |            | 2.0%       |            |
|-------------------------------|------------|------------|------------|------------|------------|------------|------------|------------|
|                               | Accept     | Reject     | Accept     | Reject     | Accept     | Reject     | Accept     | Reject     |
| <b>C<sub>p</sub> (%)</b>      | 0.50 ±0.01 | -          | 0.68 ±0.01 | -          | 0.98 ±0.00 | -          | 1.80 ±0.02 | -          |
| <b>m<sub>dry</sub> (g)</b>    | 48.5 ±1.5  | 1.41 ±0.01 | 65.9 ±0.2  | 2.05 ±0.00 | 83.1 ±0.1  | 1.90 ±0.00 | 171.4 ±0.8 | 3.52 ±0.00 |
| <b>m<sub>ash525</sub> (g)</b> | 16.5 ±0.6  | 0.83 ±0.00 | 21.7 ±0.2  | 1.22 ±0.00 | 28.4 ±0.1  | 0.73 ±0.00 | 57.3 ±0.8  | 2.01 ±0.00 |
| <b>m<sub>org</sub> (g)</b>    | 32.0 ±0.9  | 0.58 ±0.01 | 44.2 ±0.2  | 0.83 ±0.00 | 54.7 ±0.1  | 1.17 ±0.00 | 114.1 ±0.8 | 1.51 ±0.00 |
| <b>m<sub>ash900</sub> (g)</b> | 11.6 ±0.4  | 0.76 ±0.00 | 15.5 ±0.1  | 1.12 ±0.00 | 28.4 ±0.2  | 0.69 ±0.00 | 39.4 ±0.4  | 1.73 ±0.00 |
| <b>m<sub>Ag</sub> (mg)</b>    | 275 ±44    | 590 ±21    | 304 ±103   | 839        | 595 ±54    | 271        | 2169 ±36   | 498        |
| <b>SE<sub>org</sub> (%)</b>   | 98.2 ±0.4  | 1.79 ±0.01 | 98.2 ±0.7  | 1.83 ±0.01 | 97.9 ±0.4  | 2.10 ±0.01 | 98.7 ±1.0  | 1.30 ±0.01 |
| <b>SE<sub>Ag</sub> (%)</b>    | 31.4 ±2.7  | 68.6 ±1.7  | 26.6 ±9.3  | 73.4 ±6.6  | 68.7 ±8.3  | 31.3 ±2.1  | 81.3 ±1.7  | 18.7 ±0.3  |

Table S7. Centrifugal cleaning trials stream characterization, performed at a  $C_p=0.5\%$ . Legend: (-) not measured.

| Properties                    | Grade B    |            | Mix C      |            | Mix D      |            | Grade A    |            |
|-------------------------------|------------|------------|------------|------------|------------|------------|------------|------------|
|                               | Accept     | Reject     | Accept     | Reject     | Accept     | Reject     | Accept     | Reject     |
| <b>C<sub>p</sub> (%)</b>      | 0.55 ±0.00 | -          | 0.53 ±0.01 | -          | 0.53 ±0.01 | -          | 0.51 ±0.01 | -          |
| <b>m<sub>dry</sub> (g)</b>    | 51.7 ±0.1  | 1.78 ±0.00 | 50.2 ±0.4  | 1.56 ±0.05 | 50.7 ±0.5  | 0.96 ±0.00 | 48.3 ±0.4  | 1.60 ±0.07 |
| <b>m<sub>ash525</sub> (g)</b> | 9.1 ±0.1   | 1.13 ±0.00 | 8.9 ±0.1   | 0.91 ±0.04 | 12.9 ±0.2  | 0.55 ±0.01 | 16.3 ±0.4  | 0.94 ±0.03 |
| <b>m<sub>org</sub> (g)</b>    | 42.6 ±0.1  | 0.65 ±0.00 | 41.3 ±0.1  | 0.65 ±0.01 | 37.8 ±0.4  | 0.41 ±0.02 | 32.0 ±0.4  | 0.66 ±0.04 |
| <b>m<sub>ash900</sub> (g)</b> | 5.7 ±0.1   | 1.1 ±0.00  | 5.45 ±0.15 | 0.84 ±0.04 | 8.78 ±0.02 | 0.51 ±0.02 | 11.6 ±0.3  | 0.87 ±0.02 |
| <b>m<sub>Ag</sub> (mg)</b>    | 0.5 ±0.1   | 763 ±0.1   | 86 ±31     | 729 ±60    | 282 ±17    | 444 ±22    | 271 ±28    | 675 ±0     |
| <b>SE<sub>org</sub> (%)</b>   | 98.5 ±0.0  | 1.5 ±0.0   | 98.5±0.0   | 1.5 ±0.0   | 98.9 ±0.0  | 1.1 ±0.0   | 98.0 ±0.0  | 2.0 ±0.0   |
| <b>SE<sub>Ag</sub> (%)</b>    | 0.1 ±0.0   | 99.9 ±0.0  | 10.9 ±4.0  | 89.1 ±4.0  | 38.9 ±2.0  | 61.1 ±2.0  | 28.3 ±1.9  | 71.7 ±1.9  |
